# Supplementary material for: Development and evaluation of a food frequency questionnaire for use among young children
Source: PubMed Central journal article supplement (PMC7094848; doi:10.1371/journal.pone.0230669), 2020-03-25
Supplement: pone.0230669.s005.pdf [file pone.0230669.s005.pdf]

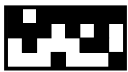

|  |  |  |  |  |  |
|--|--|--|--|--|--|
|  |  |  |  |  |  |
|--|--|--|--|--|--|

## SECTION D: YOUR CHILD'S FOOD AND EATING

**QD1 About how many serves of vegetables does your child usually eat per day? Do not include potatoes, hot chips or fried potato.** (1 serve = ½ cup cooked vegetables or 1 cup salad vegetables)  
(Please shade one response only)

| My child does not eat vegetables | Less than one serve/day | 1 serve/day             | 2 serves or more/day    |
|----------------------------------|-------------------------|-------------------------|-------------------------|
| <input type="radio"/> 0          | <input type="radio"/> 1 | <input type="radio"/> 2 | <input type="radio"/> 3 |

**QD2 About how many serves of hot chips, French fries, wedges, or fried potatoes does your child usually eat per week?** (1 serve = a small cup) (Please shade one response only)

| My child does not eat chips | Less than one serve/week | 1 serve/week            | 2 serves/week           |
|-----------------------------|--------------------------|-------------------------|-------------------------|
| <input type="radio"/> 0     | <input type="radio"/> 1  | <input type="radio"/> 2 | <input type="radio"/> 3 |

**QD3 About how many serves of potatoes does your child usually eat per week? Do not include chips, French fries, wedges or fried potatoes.** (1 serve = 1 small potato) (Please shade one response only)

| My child does not eat potatoes | Less than one serve/week | 1 serve/week            | 2 serves/week           |
|--------------------------------|--------------------------|-------------------------|-------------------------|
| <input type="radio"/> 0        | <input type="radio"/> 1  | <input type="radio"/> 2 | <input type="radio"/> 3 |

**QD4 About how many serves of fruit does your child usually eat per day? Do NOT include fruit juice.** (1 serve = 1 medium piece or 2 small pieces of fruit or 1 cup of diced pieces) (Please shade one response only)

| My child does not eat fruit | Less than one serve/day | 1 serve/day             | 2 serves or more/day    |
|-----------------------------|-------------------------|-------------------------|-------------------------|
| <input type="radio"/> 0     | <input type="radio"/> 1 | <input type="radio"/> 2 | <input type="radio"/> 3 |

**QD5 What types of bread does your child usually eat?** (Please shade any that your child usually eats)

| My child does not eat bread | High fibre white bread  | White bread             | Wholemeal bread         | Rye bread               | Multigrain bread        | Other bread             |
|-----------------------------|-------------------------|-------------------------|-------------------------|-------------------------|-------------------------|-------------------------|
| <input type="radio"/> 0     | <input type="radio"/> 1 | <input type="radio"/> 2 | <input type="radio"/> 3 | <input type="radio"/> 4 | <input type="radio"/> 5 | <input type="radio"/> 6 |

**QD6 What type of milk does your child usually drink?** (Please shade one response only)

| My child does not drink milk | Whole (full-cream/regular) | Skim                    | Low/reduced fat         | Soy                     | Other                   | Don't know              |
|------------------------------|----------------------------|-------------------------|-------------------------|-------------------------|-------------------------|-------------------------|
| <input type="radio"/> 0      | <input type="radio"/> 1    | <input type="radio"/> 2 | <input type="radio"/> 3 | <input type="radio"/> 4 | <input type="radio"/> 5 | <input type="radio"/> 6 |

**QD7 About how often is the meat your child eats trimmed of fat either before or after cooking?** (Please shade one response only)

| My child does not eat meat | Never                   | Rarely                  | Sometimes               | Usually                 | Always                  |
|----------------------------|-------------------------|-------------------------|-------------------------|-------------------------|-------------------------|
| <input type="radio"/> 0    | <input type="radio"/> 1 | <input type="radio"/> 2 | <input type="radio"/> 3 | <input type="radio"/> 4 | <input type="radio"/> 5 |

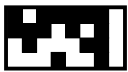

59974

|  |  |  |  |  |  |
|--|--|--|--|--|--|
|  |  |  |  |  |  |
|--|--|--|--|--|--|

QD8 Does your child take any of the following supplements? (Please shade *one* response only)

|                                                          | Never                   | Less than once/week     | 1-3 times/week          | 4-6 times/week          | Every day               |
|----------------------------------------------------------|-------------------------|-------------------------|-------------------------|-------------------------|-------------------------|
| Multivitamin and/or mineral                              | <input type="radio"/> 1 | <input type="radio"/> 2 | <input type="radio"/> 3 | <input type="radio"/> 4 | <input type="radio"/> 5 |
| Fish oils                                                | <input type="radio"/> 1 | <input type="radio"/> 2 | <input type="radio"/> 3 | <input type="radio"/> 4 | <input type="radio"/> 5 |
| Iron (separate from the multivitamin/mineral above)      | <input type="radio"/> 1 | <input type="radio"/> 2 | <input type="radio"/> 3 | <input type="radio"/> 4 | <input type="radio"/> 5 |
| Vitamin C (separate from the multivitamin/mineral above) | <input type="radio"/> 1 | <input type="radio"/> 2 | <input type="radio"/> 3 | <input type="radio"/> 4 | <input type="radio"/> 5 |

The next questions ask how many times your child has eaten certain foods over the past month.

We are not asking how much of each food s/he ate, we are asking how often they ate each food in the past month. Please respond by shading the box that best matches your answer.

## EXAMPLE ONLY

Question: How often did your child eat/drink this food/beverage *over the last month*?

(Please shade *one* response on each line)

If, for example, during each average week over the past month, your child:

- had cake once per week
- had bananas three times per week
- had toast for breakfast each morning and a sandwich for lunch on each weekday, this means that, on average, they have had bread about twice a day
- had Coco Pops three times per week and Weetbix four times

Then this is how you would complete the questions:

|                                                                           | Never or less than once a month | 1-3 times a month       | Once a week                        | 2-4 times a week                   | 5-6 times a week        | Once a day              | 2-3 times a day                    | 4-5 times a day         | 6 or more times a day   |
|---------------------------------------------------------------------------|---------------------------------|-------------------------|------------------------------------|------------------------------------|-------------------------|-------------------------|------------------------------------|-------------------------|-------------------------|
| Cakes, muffins, scones, muesli bars                                       | <input type="radio"/> 1         | <input type="radio"/> 2 | <input checked="" type="radio"/> 3 | <input type="radio"/> 4            | <input type="radio"/> 5 | <input type="radio"/> 6 | <input type="radio"/> 7            | <input type="radio"/> 8 | <input type="radio"/> 9 |
| Banana                                                                    | <input type="radio"/> 1         | <input type="radio"/> 2 | <input type="radio"/> 3            | <input checked="" type="radio"/> 4 | <input type="radio"/> 5 | <input type="radio"/> 6 | <input type="radio"/> 7            | <input type="radio"/> 8 | <input type="radio"/> 9 |
| Bread                                                                     | <input type="radio"/> 1         | <input type="radio"/> 2 | <input type="radio"/> 3            | <input type="radio"/> 4            | <input type="radio"/> 5 | <input type="radio"/> 6 | <input checked="" type="radio"/> 7 | <input type="radio"/> 8 | <input type="radio"/> 9 |
| Breakfast cereal such as Weetbix, Vitabrits, Sultana bran                 | <input type="radio"/> 1         | <input type="radio"/> 2 | <input type="radio"/> 3            | <input checked="" type="radio"/> 4 | <input type="radio"/> 5 | <input type="radio"/> 6 | <input type="radio"/> 7            | <input type="radio"/> 8 | <input type="radio"/> 9 |
| Breakfast cereal such as Nutrigrain, Rice Bubbles, Corn Flakes, Coco Pops | <input type="radio"/> 1         | <input type="radio"/> 2 | <input type="radio"/> 3            | <input checked="" type="radio"/> 4 | <input type="radio"/> 5 | <input type="radio"/> 6 | <input type="radio"/> 7            | <input type="radio"/> 8 | <input type="radio"/> 9 |

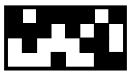

59974

|  |  |  |  |  |  |
|--|--|--|--|--|--|
|  |  |  |  |  |  |
|--|--|--|--|--|--|

**QD9** In the past month, about how often has your child had the following? (Please shade one response on each line)

| <b>MILK &amp; DAIRY FOODS</b>                                     |                                 |                         |                         |                         |                         |                         |                         |                         |                         |
|-------------------------------------------------------------------|---------------------------------|-------------------------|-------------------------|-------------------------|-------------------------|-------------------------|-------------------------|-------------------------|-------------------------|
|                                                                   | Never or less than once a month | 1-3 times a month       | Once a week             | 2-4 times a week        | 5-6 times a week        | Once a day              | 2-3 times a day         | 4-5 times a day         | 6 or more times a day   |
| Plain milk                                                        | <input type="radio"/> 1         | <input type="radio"/> 2 | <input type="radio"/> 3 | <input type="radio"/> 4 | <input type="radio"/> 5 | <input type="radio"/> 6 | <input type="radio"/> 7 | <input type="radio"/> 8 | <input type="radio"/> 9 |
| Infant formula, follow-on formula or toddler milk                 | <input type="radio"/> 1         | <input type="radio"/> 2 | <input type="radio"/> 3 | <input type="radio"/> 4 | <input type="radio"/> 5 | <input type="radio"/> 6 | <input type="radio"/> 7 | <input type="radio"/> 8 | <input type="radio"/> 9 |
| Flavoured milk drinks (e.g. milkshakes, smoothies, hot chocolate) | <input type="radio"/> 1         | <input type="radio"/> 2 | <input type="radio"/> 3 | <input type="radio"/> 4 | <input type="radio"/> 5 | <input type="radio"/> 6 | <input type="radio"/> 7 | <input type="radio"/> 8 | <input type="radio"/> 9 |
| Soy milk                                                          | <input type="radio"/> 1         | <input type="radio"/> 2 | <input type="radio"/> 3 | <input type="radio"/> 4 | <input type="radio"/> 5 | <input type="radio"/> 6 | <input type="radio"/> 7 | <input type="radio"/> 8 | <input type="radio"/> 9 |
| Yoghurt - plain or flavoured                                      | <input type="radio"/> 1         | <input type="radio"/> 2 | <input type="radio"/> 3 | <input type="radio"/> 4 | <input type="radio"/> 5 | <input type="radio"/> 6 | <input type="radio"/> 7 | <input type="radio"/> 8 | <input type="radio"/> 9 |
| Cheese - all types                                                | <input type="radio"/> 1         | <input type="radio"/> 2 | <input type="radio"/> 3 | <input type="radio"/> 4 | <input type="radio"/> 5 | <input type="radio"/> 6 | <input type="radio"/> 7 | <input type="radio"/> 8 | <input type="radio"/> 9 |
| Ice cream or custard                                              | <input type="radio"/> 1         | <input type="radio"/> 2 | <input type="radio"/> 3 | <input type="radio"/> 4 | <input type="radio"/> 5 | <input type="radio"/> 6 | <input type="radio"/> 7 | <input type="radio"/> 8 | <input type="radio"/> 9 |
| Cream or sour cream                                               | <input type="radio"/> 1         | <input type="radio"/> 2 | <input type="radio"/> 3 | <input type="radio"/> 4 | <input type="radio"/> 5 | <input type="radio"/> 6 | <input type="radio"/> 7 | <input type="radio"/> 8 | <input type="radio"/> 9 |

| <b>BREAD &amp; CEREAL FOODS</b>                                           |                                 |                         |                         |                         |                         |                         |                         |                         |                         |
|---------------------------------------------------------------------------|---------------------------------|-------------------------|-------------------------|-------------------------|-------------------------|-------------------------|-------------------------|-------------------------|-------------------------|
|                                                                           | Never or less than once a month | 1-3 times a month       | Once a week             | 2-4 times a week        | 5-6 times a week        | Once a day              | 2-3 times a day         | 4-5 times a day         | 6 or more times a day   |
| Bread and bread rolls, English muffin, bagel or crumpet                   | <input type="radio"/> 1         | <input type="radio"/> 2 | <input type="radio"/> 3 | <input type="radio"/> 4 | <input type="radio"/> 5 | <input type="radio"/> 6 | <input type="radio"/> 7 | <input type="radio"/> 8 | <input type="radio"/> 9 |
| Breakfast cereal such as Nutrigrain, Rice Bubbles, Corn Flakes, Coco pops | <input type="radio"/> 1         | <input type="radio"/> 2 | <input type="radio"/> 3 | <input type="radio"/> 4 | <input type="radio"/> 5 | <input type="radio"/> 6 | <input type="radio"/> 7 | <input type="radio"/> 8 | <input type="radio"/> 9 |
| Breakfast cereal such as Weetbix, Vitabrits, Sultana bran                 | <input type="radio"/> 1         | <input type="radio"/> 2 | <input type="radio"/> 3 | <input type="radio"/> 4 | <input type="radio"/> 5 | <input type="radio"/> 6 | <input type="radio"/> 7 | <input type="radio"/> 8 | <input type="radio"/> 9 |
| Rice – white or brown                                                     | <input type="radio"/> 1         | <input type="radio"/> 2 | <input type="radio"/> 3 | <input type="radio"/> 4 | <input type="radio"/> 5 | <input type="radio"/> 6 | <input type="radio"/> 7 | <input type="radio"/> 8 | <input type="radio"/> 9 |
| Pasta or noodles – white or wholemeal                                     | <input type="radio"/> 1         | <input type="radio"/> 2 | <input type="radio"/> 3 | <input type="radio"/> 4 | <input type="radio"/> 5 | <input type="radio"/> 6 | <input type="radio"/> 7 | <input type="radio"/> 8 | <input type="radio"/> 9 |

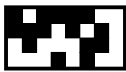

59974

|  |  |  |  |  |  |
|--|--|--|--|--|--|
|  |  |  |  |  |  |
|--|--|--|--|--|--|

QD9cont. In the past month, about how often has your child had the following? (Please shade one response on each line)

| <b>MEAT, FISH &amp; EGGS</b>                                  |                                 |                         |                         |                         |                         |                         |                         |                         |                         |
|---------------------------------------------------------------|---------------------------------|-------------------------|-------------------------|-------------------------|-------------------------|-------------------------|-------------------------|-------------------------|-------------------------|
|                                                               | Never or less than once a month | 1-3 times a month       | Once a week             | 2-4 times a week        | 5-6 times a week        | Once a day              | 2-3 times a day         | 4-5 times a day         | 6 or more times a day   |
| Beef or lamb (e.g. steak, roast)                              | <input type="radio"/> 1         | <input type="radio"/> 2 | <input type="radio"/> 3 | <input type="radio"/> 4 | <input type="radio"/> 5 | <input type="radio"/> 6 | <input type="radio"/> 7 | <input type="radio"/> 8 | <input type="radio"/> 9 |
| Dishes with beef or lamb (e.g. casserole, stir-fry)           | <input type="radio"/> 1         | <input type="radio"/> 2 | <input type="radio"/> 3 | <input type="radio"/> 4 | <input type="radio"/> 5 | <input type="radio"/> 6 | <input type="radio"/> 7 | <input type="radio"/> 8 | <input type="radio"/> 9 |
| Ham, luncheon meat, bacon, salami                             | <input type="radio"/> 1         | <input type="radio"/> 2 | <input type="radio"/> 3 | <input type="radio"/> 4 | <input type="radio"/> 5 | <input type="radio"/> 6 | <input type="radio"/> 7 | <input type="radio"/> 8 | <input type="radio"/> 9 |
| Chicken – roast, steamed, BBQ                                 | <input type="radio"/> 1         | <input type="radio"/> 2 | <input type="radio"/> 3 | <input type="radio"/> 4 | <input type="radio"/> 5 | <input type="radio"/> 6 | <input type="radio"/> 7 | <input type="radio"/> 8 | <input type="radio"/> 9 |
| Crumbed chicken (e.g. chicken nuggets, schnitzel)             | <input type="radio"/> 1         | <input type="radio"/> 2 | <input type="radio"/> 3 | <input type="radio"/> 4 | <input type="radio"/> 5 | <input type="radio"/> 6 | <input type="radio"/> 7 | <input type="radio"/> 8 | <input type="radio"/> 9 |
| Pork – roast, chop or steak                                   | <input type="radio"/> 1         | <input type="radio"/> 2 | <input type="radio"/> 3 | <input type="radio"/> 4 | <input type="radio"/> 5 | <input type="radio"/> 6 | <input type="radio"/> 7 | <input type="radio"/> 8 | <input type="radio"/> 9 |
| Dishes with pork, bacon or ham (e.g. casserole, stir-fry)     | <input type="radio"/> 1         | <input type="radio"/> 2 | <input type="radio"/> 3 | <input type="radio"/> 4 | <input type="radio"/> 5 | <input type="radio"/> 6 | <input type="radio"/> 7 | <input type="radio"/> 8 | <input type="radio"/> 9 |
| Fish - fried, battered, crumbed (includes fish fingers)       | <input type="radio"/> 1         | <input type="radio"/> 2 | <input type="radio"/> 3 | <input type="radio"/> 4 | <input type="radio"/> 5 | <input type="radio"/> 6 | <input type="radio"/> 7 | <input type="radio"/> 8 | <input type="radio"/> 9 |
| Fresh fish or seafood or canned fish (e.g. tuna, salmon)      | <input type="radio"/> 1         | <input type="radio"/> 2 | <input type="radio"/> 3 | <input type="radio"/> 4 | <input type="radio"/> 5 | <input type="radio"/> 6 | <input type="radio"/> 7 | <input type="radio"/> 8 | <input type="radio"/> 9 |
| Dishes with fish or seafood (e.g. casserole, stir-fry)        | <input type="radio"/> 1         | <input type="radio"/> 2 | <input type="radio"/> 3 | <input type="radio"/> 4 | <input type="radio"/> 5 | <input type="radio"/> 6 | <input type="radio"/> 7 | <input type="radio"/> 8 | <input type="radio"/> 9 |
| Sausages and Frankfurts (all types- boiled, grilled or fried) | <input type="radio"/> 1         | <input type="radio"/> 2 | <input type="radio"/> 3 | <input type="radio"/> 4 | <input type="radio"/> 5 | <input type="radio"/> 6 | <input type="radio"/> 7 | <input type="radio"/> 8 | <input type="radio"/> 9 |
| Eggs- boiled, scrambled                                       | <input type="radio"/> 1         | <input type="radio"/> 2 | <input type="radio"/> 3 | <input type="radio"/> 4 | <input type="radio"/> 5 | <input type="radio"/> 6 | <input type="radio"/> 7 | <input type="radio"/> 8 | <input type="radio"/> 9 |

| <b>BEVERAGES</b>                                                                       |                                 |                         |                         |                         |                         |                         |                         |                         |                         |
|----------------------------------------------------------------------------------------|---------------------------------|-------------------------|-------------------------|-------------------------|-------------------------|-------------------------|-------------------------|-------------------------|-------------------------|
|                                                                                        | Never or less than once a month | 1-3 times a month       | Once a week             | 2-4 times a week        | 5-6 times a week        | Once a day              | 2-3 times a day         | 4-5 times a day         | 6 or more times a day   |
| Plain water (e.g. tap water, bottled water, filtered water, unflavoured mineral water) | <input type="radio"/> 1         | <input type="radio"/> 2 | <input type="radio"/> 3 | <input type="radio"/> 4 | <input type="radio"/> 5 | <input type="radio"/> 6 | <input type="radio"/> 7 | <input type="radio"/> 8 | <input type="radio"/> 9 |
| Fruit juice (100% juice)                                                               | <input type="radio"/> 1         | <input type="radio"/> 2 | <input type="radio"/> 3 | <input type="radio"/> 4 | <input type="radio"/> 5 | <input type="radio"/> 6 | <input type="radio"/> 7 | <input type="radio"/> 8 | <input type="radio"/> 9 |
| Soft drink, cordial, sports drinks or fruit juice drinks                               | <input type="radio"/> 1         | <input type="radio"/> 2 | <input type="radio"/> 3 | <input type="radio"/> 4 | <input type="radio"/> 5 | <input type="radio"/> 6 | <input type="radio"/> 7 | <input type="radio"/> 8 | <input type="radio"/> 9 |
| Diet soft drinks or cordial                                                            | <input type="radio"/> 1         | <input type="radio"/> 2 | <input type="radio"/> 3 | <input type="radio"/> 4 | <input type="radio"/> 5 | <input type="radio"/> 6 | <input type="radio"/> 7 | <input type="radio"/> 8 | <input type="radio"/> 9 |

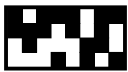

59974

|  |  |  |  |  |  |
|--|--|--|--|--|--|
|  |  |  |  |  |  |
|--|--|--|--|--|--|

QD9cont. In the past month, about how often has your child had the following? (Please shade one response on each line)

| MISCELLANEOUS FOODS                                              |                                 |                         |                         |                         |                         |                         |                         |                         |                         |
|------------------------------------------------------------------|---------------------------------|-------------------------|-------------------------|-------------------------|-------------------------|-------------------------|-------------------------|-------------------------|-------------------------|
|                                                                  | Never or less than once a month | 1-3 times a month       | Once a week             | 2-4 times a week        | 5-6 times a week        | Once a day              | 2-3 times a day         | 4-5 times a day         | 6 or more times a day   |
| Cakes, muffins, scones, muesli bars                              | <input type="radio"/> 1         | <input type="radio"/> 2 | <input type="radio"/> 3 | <input type="radio"/> 4 | <input type="radio"/> 5 | <input type="radio"/> 6 | <input type="radio"/> 7 | <input type="radio"/> 8 | <input type="radio"/> 9 |
| Sweet biscuits - all types                                       | <input type="radio"/> 1         | <input type="radio"/> 2 | <input type="radio"/> 3 | <input type="radio"/> 4 | <input type="radio"/> 5 | <input type="radio"/> 6 | <input type="radio"/> 7 | <input type="radio"/> 8 | <input type="radio"/> 9 |
| Chocolate and sweets/lollies                                     | <input type="radio"/> 1         | <input type="radio"/> 2 | <input type="radio"/> 3 | <input type="radio"/> 4 | <input type="radio"/> 5 | <input type="radio"/> 6 | <input type="radio"/> 7 | <input type="radio"/> 8 | <input type="radio"/> 9 |
| Crisps, corn chips, Twisties                                     | <input type="radio"/> 1         | <input type="radio"/> 2 | <input type="radio"/> 3 | <input type="radio"/> 4 | <input type="radio"/> 5 | <input type="radio"/> 6 | <input type="radio"/> 7 | <input type="radio"/> 8 | <input type="radio"/> 9 |
| Crackers and crispbreads (e.g. rice cakes)                       | <input type="radio"/> 1         | <input type="radio"/> 2 | <input type="radio"/> 3 | <input type="radio"/> 4 | <input type="radio"/> 5 | <input type="radio"/> 6 | <input type="radio"/> 7 | <input type="radio"/> 8 | <input type="radio"/> 9 |
| Savoury biscuits (e.g. Jatz, Shapes)                             | <input type="radio"/> 1         | <input type="radio"/> 2 | <input type="radio"/> 3 | <input type="radio"/> 4 | <input type="radio"/> 5 | <input type="radio"/> 6 | <input type="radio"/> 7 | <input type="radio"/> 8 | <input type="radio"/> 9 |
| Savoury pies and pastries (e.g. sausage roll, meat pies, pastie) | <input type="radio"/> 1         | <input type="radio"/> 2 | <input type="radio"/> 3 | <input type="radio"/> 4 | <input type="radio"/> 5 | <input type="radio"/> 6 | <input type="radio"/> 7 | <input type="radio"/> 8 | <input type="radio"/> 9 |
| Hamburgers (e.g. McDonalds)                                      | <input type="radio"/> 1         | <input type="radio"/> 2 | <input type="radio"/> 3 | <input type="radio"/> 4 | <input type="radio"/> 5 | <input type="radio"/> 6 | <input type="radio"/> 7 | <input type="radio"/> 8 | <input type="radio"/> 9 |
| Pizza                                                            | <input type="radio"/> 1         | <input type="radio"/> 2 | <input type="radio"/> 3 | <input type="radio"/> 4 | <input type="radio"/> 5 | <input type="radio"/> 6 | <input type="radio"/> 7 | <input type="radio"/> 8 | <input type="radio"/> 9 |
| Peanuts, peanut butter, other nuts seeds or tahini               | <input type="radio"/> 1         | <input type="radio"/> 2 | <input type="radio"/> 3 | <input type="radio"/> 4 | <input type="radio"/> 5 | <input type="radio"/> 6 | <input type="radio"/> 7 | <input type="radio"/> 8 | <input type="radio"/> 9 |
| Sugar, jam, honey, syrups                                        | <input type="radio"/> 1         | <input type="radio"/> 2 | <input type="radio"/> 3 | <input type="radio"/> 4 | <input type="radio"/> 5 | <input type="radio"/> 6 | <input type="radio"/> 7 | <input type="radio"/> 8 | <input type="radio"/> 9 |
| Butter or dairy spreads on bread or cooked vegetables            | <input type="radio"/> 1         | <input type="radio"/> 2 | <input type="radio"/> 3 | <input type="radio"/> 4 | <input type="radio"/> 5 | <input type="radio"/> 6 | <input type="radio"/> 7 | <input type="radio"/> 8 | <input type="radio"/> 9 |
| Margarine on bread or cooked vegetables                          | <input type="radio"/> 1         | <input type="radio"/> 2 | <input type="radio"/> 3 | <input type="radio"/> 4 | <input type="radio"/> 5 | <input type="radio"/> 6 | <input type="radio"/> 7 | <input type="radio"/> 8 | <input type="radio"/> 9 |

| VEGETABLES (including fresh, frozen and tinned) |                                 |                         |                         |                         |                         |                         |                         |                         |                         |
|-------------------------------------------------|---------------------------------|-------------------------|-------------------------|-------------------------|-------------------------|-------------------------|-------------------------|-------------------------|-------------------------|
|                                                 | Never or less than once a month | 1-3 times a month       | Once a week             | 2-4 times a week        | 5-6 times a week        | Once a day              | 2-3 times a day         | 4-5 times a day         | 6 or more times a day   |
| Hot chips, potato wedges                        | <input type="radio"/> 1         | <input type="radio"/> 2 | <input type="radio"/> 3 | <input type="radio"/> 4 | <input type="radio"/> 5 | <input type="radio"/> 6 | <input type="radio"/> 7 | <input type="radio"/> 8 | <input type="radio"/> 9 |
| Potato - Boiled, baked                          | <input type="radio"/> 1         | <input type="radio"/> 2 | <input type="radio"/> 3 | <input type="radio"/> 4 | <input type="radio"/> 5 | <input type="radio"/> 6 | <input type="radio"/> 7 | <input type="radio"/> 8 | <input type="radio"/> 9 |
| Carrot                                          | <input type="radio"/> 1         | <input type="radio"/> 2 | <input type="radio"/> 3 | <input type="radio"/> 4 | <input type="radio"/> 5 | <input type="radio"/> 6 | <input type="radio"/> 7 | <input type="radio"/> 8 | <input type="radio"/> 9 |
| Tomato                                          | <input type="radio"/> 1         | <input type="radio"/> 2 | <input type="radio"/> 3 | <input type="radio"/> 4 | <input type="radio"/> 5 | <input type="radio"/> 6 | <input type="radio"/> 7 | <input type="radio"/> 8 | <input type="radio"/> 9 |
| Broccoli                                        | <input type="radio"/> 1         | <input type="radio"/> 2 | <input type="radio"/> 3 | <input type="radio"/> 4 | <input type="radio"/> 5 | <input type="radio"/> 6 | <input type="radio"/> 7 | <input type="radio"/> 8 | <input type="radio"/> 9 |

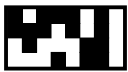

59974

|  |  |  |  |  |  |
|--|--|--|--|--|--|
|  |  |  |  |  |  |
|--|--|--|--|--|--|

QD9cont. In the past month, about how often has your child had the following? (Please shade one response on each line)

| VEGETABLES cont. |                                 |                         |                         |                         |                         |                         |                         |                         |                         |
|------------------|---------------------------------|-------------------------|-------------------------|-------------------------|-------------------------|-------------------------|-------------------------|-------------------------|-------------------------|
|                  | Never or less than once a month | 1-3 times a month       | Once a week             | 2-4 times a week        | 5-6 times a week        | Once a day              | 2-3 times a day         | 4-5 times a day         | 6 or more times a day   |
| Peas             | <input type="radio"/> 1         | <input type="radio"/> 2 | <input type="radio"/> 3 | <input type="radio"/> 4 | <input type="radio"/> 5 | <input type="radio"/> 6 | <input type="radio"/> 7 | <input type="radio"/> 8 | <input type="radio"/> 9 |
| Cauliflower      | <input type="radio"/> 1         | <input type="radio"/> 2 | <input type="radio"/> 3 | <input type="radio"/> 4 | <input type="radio"/> 5 | <input type="radio"/> 6 | <input type="radio"/> 7 | <input type="radio"/> 8 | <input type="radio"/> 9 |
| Cucumber         | <input type="radio"/> 1         | <input type="radio"/> 2 | <input type="radio"/> 3 | <input type="radio"/> 4 | <input type="radio"/> 5 | <input type="radio"/> 6 | <input type="radio"/> 7 | <input type="radio"/> 8 | <input type="radio"/> 9 |
| Capsicum         | <input type="radio"/> 1         | <input type="radio"/> 2 | <input type="radio"/> 3 | <input type="radio"/> 4 | <input type="radio"/> 5 | <input type="radio"/> 6 | <input type="radio"/> 7 | <input type="radio"/> 8 | <input type="radio"/> 9 |
| Onion            | <input type="radio"/> 1         | <input type="radio"/> 2 | <input type="radio"/> 3 | <input type="radio"/> 4 | <input type="radio"/> 5 | <input type="radio"/> 6 | <input type="radio"/> 7 | <input type="radio"/> 8 | <input type="radio"/> 9 |
| Corn             | <input type="radio"/> 1         | <input type="radio"/> 2 | <input type="radio"/> 3 | <input type="radio"/> 4 | <input type="radio"/> 5 | <input type="radio"/> 6 | <input type="radio"/> 7 | <input type="radio"/> 8 | <input type="radio"/> 9 |
| Pumpkin          | <input type="radio"/> 1         | <input type="radio"/> 2 | <input type="radio"/> 3 | <input type="radio"/> 4 | <input type="radio"/> 5 | <input type="radio"/> 6 | <input type="radio"/> 7 | <input type="radio"/> 8 | <input type="radio"/> 9 |
| Zucchini         | <input type="radio"/> 1         | <input type="radio"/> 2 | <input type="radio"/> 3 | <input type="radio"/> 4 | <input type="radio"/> 5 | <input type="radio"/> 6 | <input type="radio"/> 7 | <input type="radio"/> 8 | <input type="radio"/> 9 |
| Mushroom         | <input type="radio"/> 1         | <input type="radio"/> 2 | <input type="radio"/> 3 | <input type="radio"/> 4 | <input type="radio"/> 5 | <input type="radio"/> 6 | <input type="radio"/> 7 | <input type="radio"/> 8 | <input type="radio"/> 9 |

| FRUITS (including fresh, frozen and tinned)  |                                 |                         |                         |                         |                         |                         |                         |                         |                         |
|----------------------------------------------|---------------------------------|-------------------------|-------------------------|-------------------------|-------------------------|-------------------------|-------------------------|-------------------------|-------------------------|
|                                              | Never or less than once a month | 1-3 times a month       | Once a week             | 2-4 times a week        | 5-6 times a week        | Once a day              | 2-3 times a day         | 4-5 times a day         | 6 or more times a day   |
| Apple and pear                               | <input type="radio"/> 1         | <input type="radio"/> 2 | <input type="radio"/> 3 | <input type="radio"/> 4 | <input type="radio"/> 5 | <input type="radio"/> 6 | <input type="radio"/> 7 | <input type="radio"/> 8 | <input type="radio"/> 9 |
| Orange, mandarin and other citrus fruit      | <input type="radio"/> 1         | <input type="radio"/> 2 | <input type="radio"/> 3 | <input type="radio"/> 4 | <input type="radio"/> 5 | <input type="radio"/> 6 | <input type="radio"/> 7 | <input type="radio"/> 8 | <input type="radio"/> 9 |
| Banana                                       | <input type="radio"/> 1         | <input type="radio"/> 2 | <input type="radio"/> 3 | <input type="radio"/> 4 | <input type="radio"/> 5 | <input type="radio"/> 6 | <input type="radio"/> 7 | <input type="radio"/> 8 | <input type="radio"/> 9 |
| Grapes                                       | <input type="radio"/> 1         | <input type="radio"/> 2 | <input type="radio"/> 3 | <input type="radio"/> 4 | <input type="radio"/> 5 | <input type="radio"/> 6 | <input type="radio"/> 7 | <input type="radio"/> 8 | <input type="radio"/> 9 |
| Strawberries                                 | <input type="radio"/> 1         | <input type="radio"/> 2 | <input type="radio"/> 3 | <input type="radio"/> 4 | <input type="radio"/> 5 | <input type="radio"/> 6 | <input type="radio"/> 7 | <input type="radio"/> 8 | <input type="radio"/> 9 |
| Watermelon                                   | <input type="radio"/> 1         | <input type="radio"/> 2 | <input type="radio"/> 3 | <input type="radio"/> 4 | <input type="radio"/> 5 | <input type="radio"/> 6 | <input type="radio"/> 7 | <input type="radio"/> 8 | <input type="radio"/> 9 |
| Kiwi fruit                                   | <input type="radio"/> 1         | <input type="radio"/> 2 | <input type="radio"/> 3 | <input type="radio"/> 4 | <input type="radio"/> 5 | <input type="radio"/> 6 | <input type="radio"/> 7 | <input type="radio"/> 8 | <input type="radio"/> 9 |
| Peach, apricot, nectarine, plum              | <input type="radio"/> 1         | <input type="radio"/> 2 | <input type="radio"/> 3 | <input type="radio"/> 4 | <input type="radio"/> 5 | <input type="radio"/> 6 | <input type="radio"/> 7 | <input type="radio"/> 8 | <input type="radio"/> 9 |
| Pineapple                                    | <input type="radio"/> 1         | <input type="radio"/> 2 | <input type="radio"/> 3 | <input type="radio"/> 4 | <input type="radio"/> 5 | <input type="radio"/> 6 | <input type="radio"/> 7 | <input type="radio"/> 8 | <input type="radio"/> 9 |
| Rockmelon                                    | <input type="radio"/> 1         | <input type="radio"/> 2 | <input type="radio"/> 3 | <input type="radio"/> 4 | <input type="radio"/> 5 | <input type="radio"/> 6 | <input type="radio"/> 7 | <input type="radio"/> 8 | <input type="radio"/> 9 |
| Dried fruit (e.g. sultanas, apricots)        | <input type="radio"/> 1         | <input type="radio"/> 2 | <input type="radio"/> 3 | <input type="radio"/> 4 | <input type="radio"/> 5 | <input type="radio"/> 6 | <input type="radio"/> 7 | <input type="radio"/> 8 | <input type="radio"/> 9 |
| Fruit - canned in syrup or cooked with sugar | <input type="radio"/> 1         | <input type="radio"/> 2 | <input type="radio"/> 3 | <input type="radio"/> 4 | <input type="radio"/> 5 | <input type="radio"/> 6 | <input type="radio"/> 7 | <input type="radio"/> 8 | <input type="radio"/> 9 |
